# Supplementary material for: The Neuropathological Diagnosis of Alzheimer’s Disease—The Challenges of Pathological Mimics and Concomitant Pathology
Source: PubMed Central journal article supplement (PMC7463915; doi:10.3390/brainsci10080479), 2020-07-24
Supplement: brainsci-10-00479-s001.pdf [file brainsci-10-00479-s001.pdf]

# Supplementary Materials: The Neuropathological Diagnosis of Alzheimer’s Disease – The Challenges of Pathological Mimics and Concomitant Pathology

Andrew King , Istvan Bodi and Claire Troakes

**Table S1.** Table to illustrate the Braak and Braak Staging for Neurofibrillary Tangles (NTs) and Threads in Alzheimer’s disease (after Braak and Braak [8]).

| Stage | Regions     | Distribution of neurofibrillary tangles And threads          |
|-------|-------------|--------------------------------------------------------------|
| I     | Entorhinal  | Transentorhinal and entorhinal                               |
| II    |             | Above and CA1 region of hippocampus                          |
| III   | Limbic      | Above and Subiculum of hippocampus                           |
| IV    |             | Above and Amygdala, thalamus and claustrum                   |
| V     | Isocortical | Above and Associative cortical areas e.g. parastriate cortex |
| VI    |             | Above and primary visual areas e.g. calcarine cortex         |

**Table S2.** Modified Braak/Brain Net Europe neurofibrillary staging system for AD (after Alafuzoff et al. [9]).

| Stage     | Regions of brain affected                                 | affected and density of neuropil threads (Nths)                                                                             |
|-----------|-----------------------------------------------------------|-----------------------------------------------------------------------------------------------------------------------------|
| Stage 0   | All sections                                              | No HP-Tau                                                                                                                   |
| Stage +   | Any section                                               | Very occasional tangles, pretangles and Nths and not in any pattern not fit to any other tauopathy                          |
| Stage I   | Anterior hippocampus at uncus level                       | NThs of at least low density in transentorhinal region                                                                      |
| Stage II  | Anterior hippocampus at uncus level                       | NThs of at least moderate density outer layers of entorhinal region; at least low density inner layers of entorhinal region |
|           | Posterior hippocampus at level of lateral geniculate body | NThs of at least moderate density outer layers of entorhinal; at least low density inner layers of entorhinal region        |
| Stage III | Anterior hippocampus at uncus level                       | NThs of at least moderate density in superficial and deep layers of the occipito-temporal gyrus.                            |
|           | Posterior hippocampus at level of lateral geniculate body | NThs of at least moderate density in outer and inner layers of entorhinal region and continuing to occipito-temporal gyrus. |
| Stage IV  | Severe involvement of middle temporal gyrus               | NThs of at least moderate density in superficial and/or deep layers middle temporal gyrus                                   |

|          |                                        |                                                                                                          |
|----------|----------------------------------------|----------------------------------------------------------------------------------------------------------|
| Stage V  |                                        | NThs of at least moderate density in superficial and deep layers of peristriate (and parastriate) cortex |
| Stage VI | Severe involvement of occipital cortex | NThs of at least moderate density in layer V of the striate area.                                        |

**Table S3.** CERAD score for neuritic plaques (after Mirra et al. [10]).

**Age related plaque score:**

| Age   | Frequency of Plaques |        |          |          |
|-------|----------------------|--------|----------|----------|
|       | None                 | Sparse | Moderate | Frequent |
| <50   | 0                    | C      | C        | C        |
| 50-75 | 0                    | B      | C        | C        |
| >75   | 0                    | A      | B        | C        |

0-No Histological evidence of AD  
A-Histological findings are uncertain evidence of AD  
B-Histological findings suggest the diagnosis of AD  
C-Histological findings indicate the diagnosis of AD

Minimum six areas of cerebrum sampled : Middle frontal gyrus, superior and middle temporal gyri, anterior cingulate gyrus, inferior parietal lobule, hippocampus and entorhinal cortex, midbrain including nigra.

Neuritic plaque semi-quantitative count (silver stain, or HP-tau) A $\beta$  does not detect neuritic elements.

**Table S4.** Thal phases for brain parenchymal A $\beta$  deposition (Present or absent) (after Thal *et al.* [11]).

|                |                                                                               |
|----------------|-------------------------------------------------------------------------------|
| <b>Phase 1</b> | <b>Isocortical e.g. frontal cortex , occipital cortex</b>                     |
| Phase 2        | Above and allocortical deposits e.g. entorhinal cortex, hippocampus, amygdala |
| Phase 3        | Above and subcortical nuclei e.g. striatum and thalamus                       |
| Phase 4        | Above and brainstem structures e.g. substantia nigra                          |
| Phase 5        | Above and molecular layer of cerebellum or pons                               |
